# Supplementary material for: Photolysis and oxidation by OH radicals of two carbonyl nitrates: 4-nitrooxy-2-butanone and 5-nitrooxy-2-pentanone
Source: Copernicus journal article supplement (doi:10.5194/acp-2019-801), 2019-09-20
Supplement: Supplementary file [file acp-2019-801-AC1-supplement.zip]

## Supporting information

**Figure S1.** Comparison of solar actinic flux calculated from TUV NCAR (40°N, 1<sup>st</sup> July, noon, total ozone column 300 DU and albedo 0.1) and actinic flux measured in CESAM chamber for 3x4 kW high pressure Xenon lamps combined with 7 mm Pyrex filter. Left scale: solar spectrum; right scale: lamp spectrum.

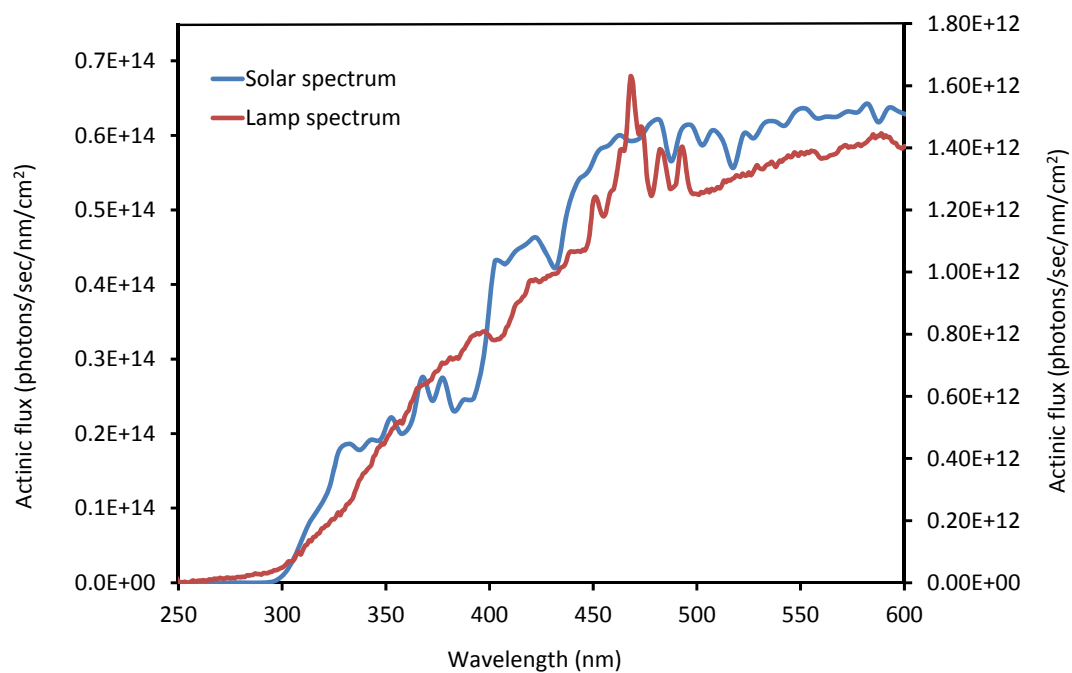

**Figure S1.**
